# Supplementary material
Source: Research Square preprint supplement (doi:10.21203/rs.3.rs-9003021/v1)
Supplement: Supplementary file 1 [file 06a8025864697fd09e397925.docx]

Supplementary

Self-efficacy related to diabetes management and perceived diabetes management problems

To what extent do you agree with the following statements regarding the management of your child’s diabetes? Please rate your response on a scale of 1 to 5, where 1 - I strongly disagree; 2 - I somewhat disagree; 3 - I’m not sure; 4 - I somewhat agree; 5 - I strongly agree

1. I am familiar with the treatment possibilities of type 1 diabetes.

2. I am familiar with diabetes management tools.

3. I am familiar with HbA1c and I know why we keep track of its value.

4. I make good use of the diabetes management tools of my child.

5. I can effectively treat my child's diabetes.

How much of a problem do you consider the following to be in managing your child’s diabetes? Please rate your answer on a scale of 1 to 5, where 1 - Not a problem at all; 2 - A little of a problem; 3 - Moderately of a problem; 4 - Quite a big problem; 5 - A very big problem

1. Controlling blood sugar levels by day.

2. Controlling blood sugar levels by night.

3. Adapting to this new way of living (type 1 diabetes related).
